# Supplementary material
Source: PubMed Central journal article supplement (PMC10108866)

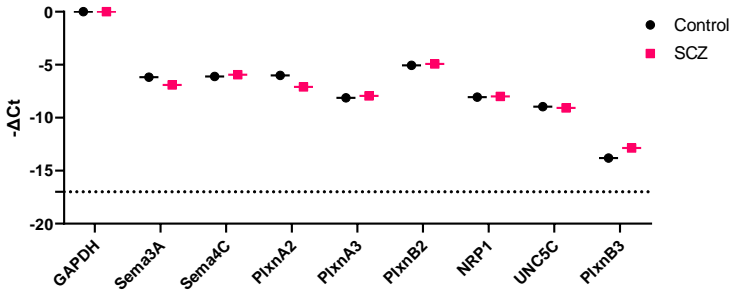

Supplement: NIHMS1884330-supplement-Supplementary_Figure_2.pdf [file NIHMS1884330-supplement-Supplementary_Figure_2.pdf]
